# Supplementary material for: Immune Response of an Oral Enterococcus faecalis Phage Cocktail in a Mouse Model of Ethanol-Induced Liver Disease
Source: MDPI journal article supplement (doi:10.3390/v14030490), 2022-02-27
Supplement: s1 [file s1]

**Supplementary Figure S1**

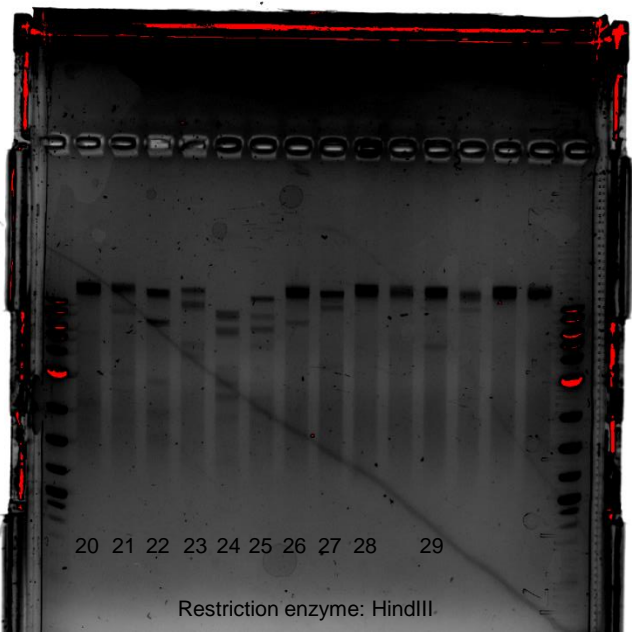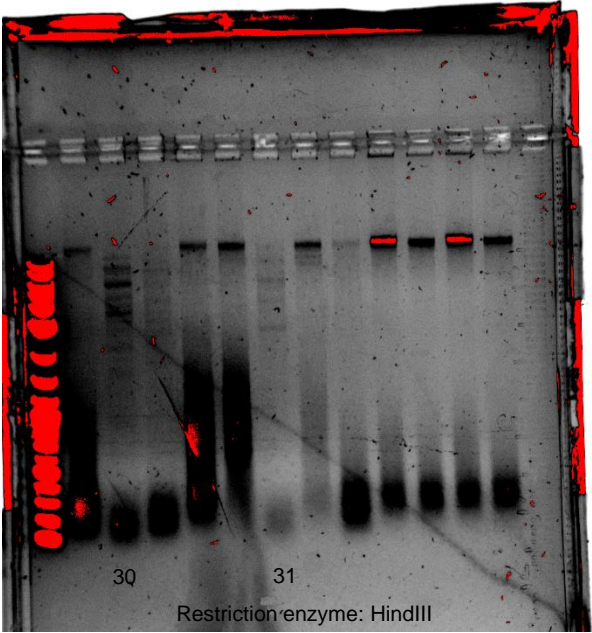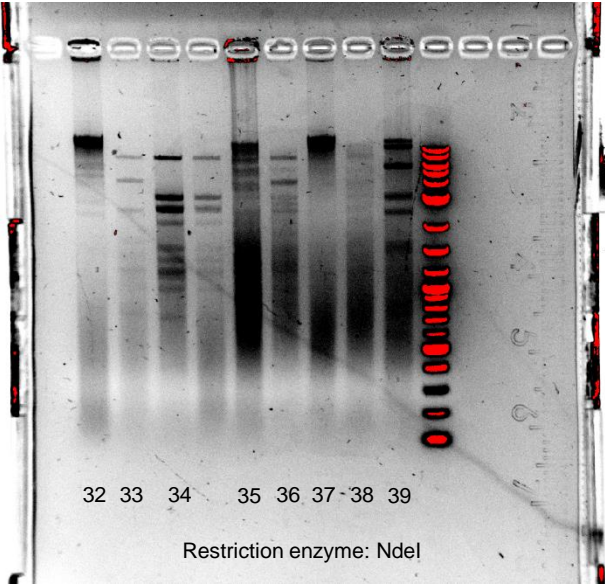

**Supplementary Figure S1.** Restriction enzyme digestion. All newly isolated phages were digested by restriction enzymes, then ran on 1% agarose gel, to distinguish different phage isolates, indicated by a different gel pattern. Phages numbers are indicated on the gel.
